# Supplementary material
Source: MDPI journal article supplement (https://www.mdpi.com/search?q=molecules-24-00548)

*Supporting Information*

**Synthesis and Biological evaluation of quinoline derivatives as a novel class of broad-spectrum antibacterial agents**

Hai-Gen Fu, Zhi-Wen Li, Xin-Xin Hu, Xue-Lian Zhang, Shu-Yi Si, Xue-Fu You,  
Sheng Tang, Yan-Xiang Wang, Dan-Qing Song

Figure S1. <sup>1</sup>H NMR (top) and <sup>13</sup>C NMR (bottom) of 5-Chloro-13-methyl-3, 4-dihydro-2H-[1, 3]oxazino-[5, 6-h]quinoline (**4a**)

20140630-D-20  
 BRUKER AV-III-500 1H-NMR D-20a IN DMSO 2014.06.30  
 PROTON DMSO E:\\ kangjunsu 9

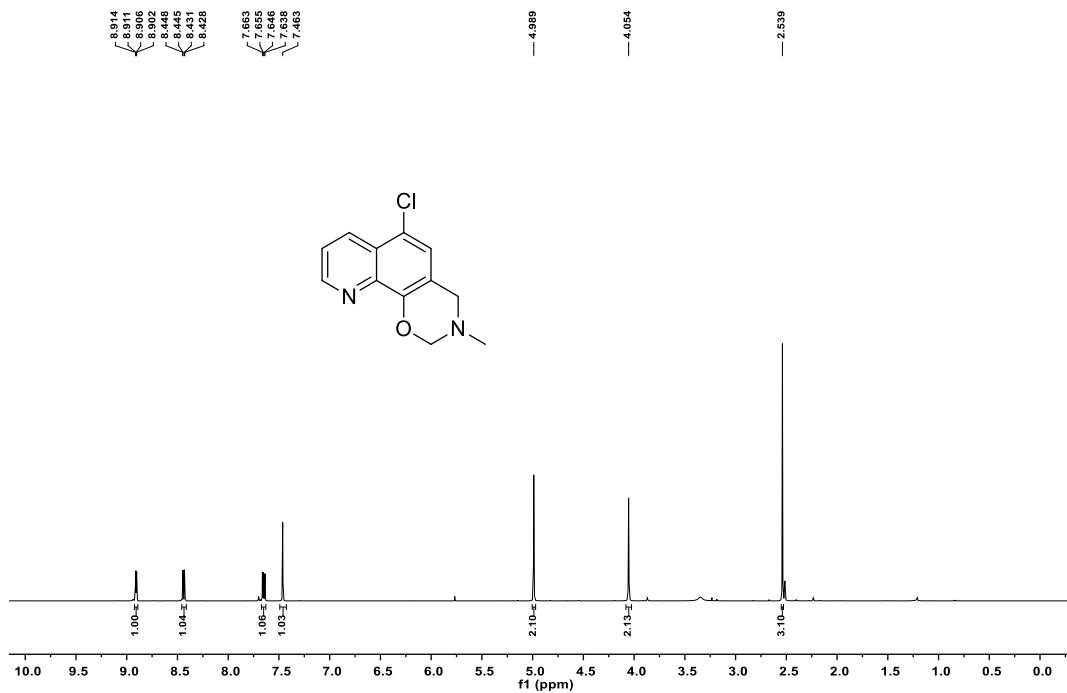

20140704-D-20  
 BRUKER AV-III-500 13C-NMR D-20 IN CDCL3 2014.07.04  
 C13CPD CDCL3 E:\\ kangjunsu 4

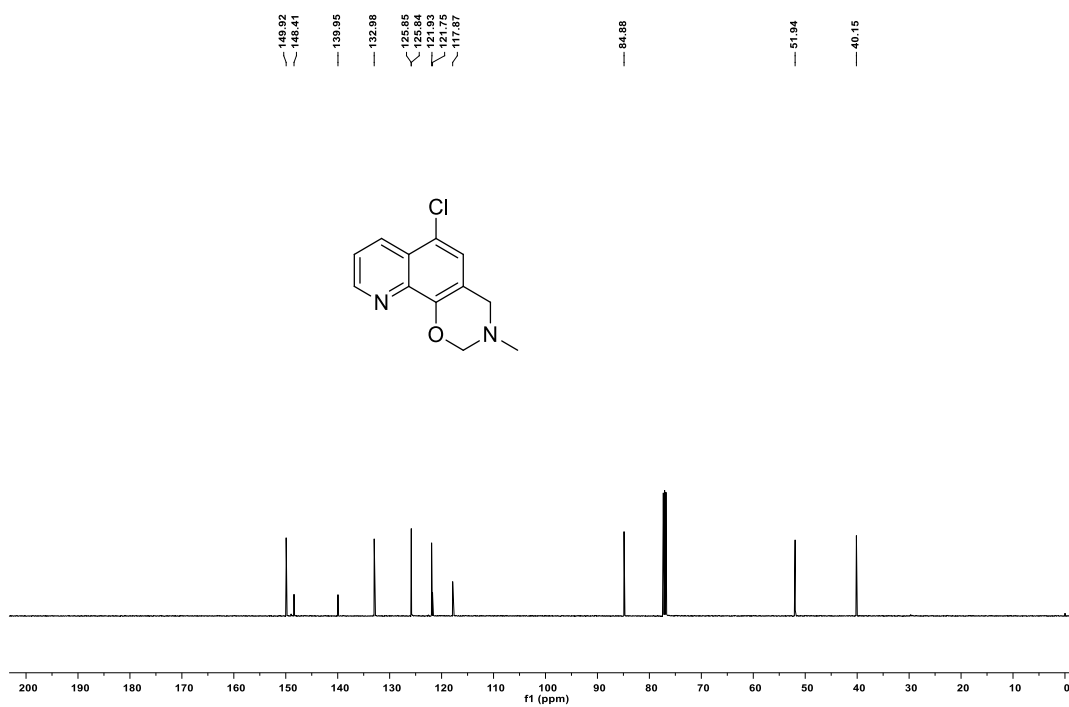

Figure S2.  $^1\text{H}$  NMR (top) and  $^{13}\text{C}$  NMR (bottom) of 5-Chloro-13-propyl-3, 4-dihydro-2H-[1,3]oxazino-[5, 6-h]quinoline (**4b**)

20140704-D-21a  
 BRUKER AV-111-500  $^1\text{H}$ -NMR D-21a IN DMSO 2014.07.04  
 PROTON DMSO E:\ kangjunsu 6

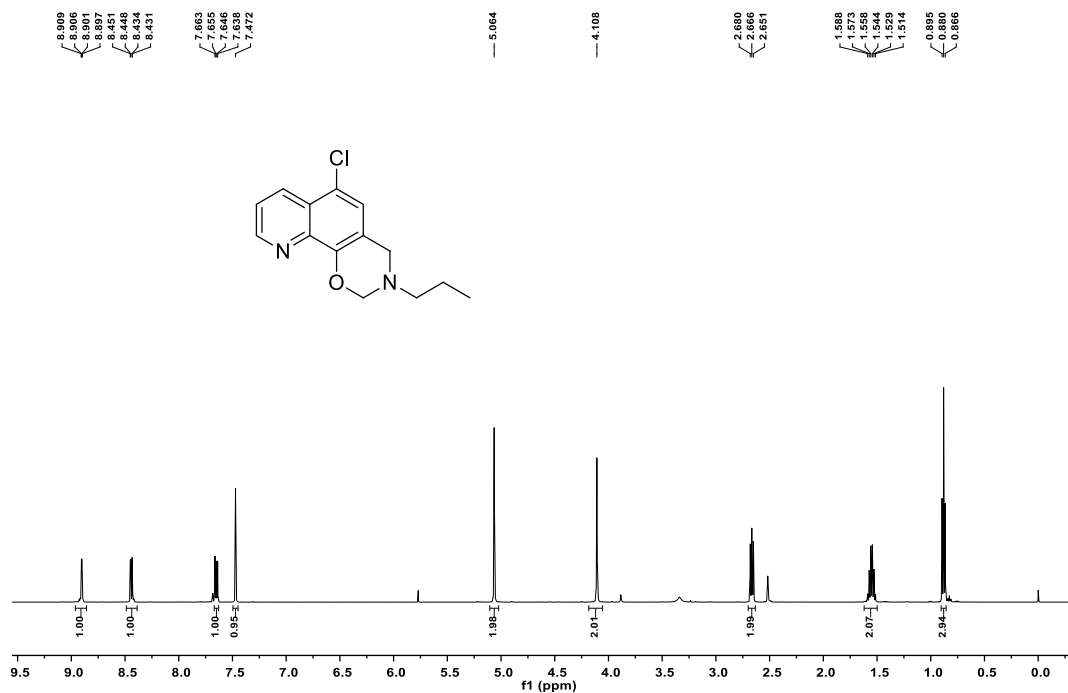

20140708-D-21a  
 BRUKER AV-111-500  $^{13}\text{C}$ -NMR D-21a IN DMSO 2014.07.08  
 C13CPD DMSO E:\ songdanqing 38

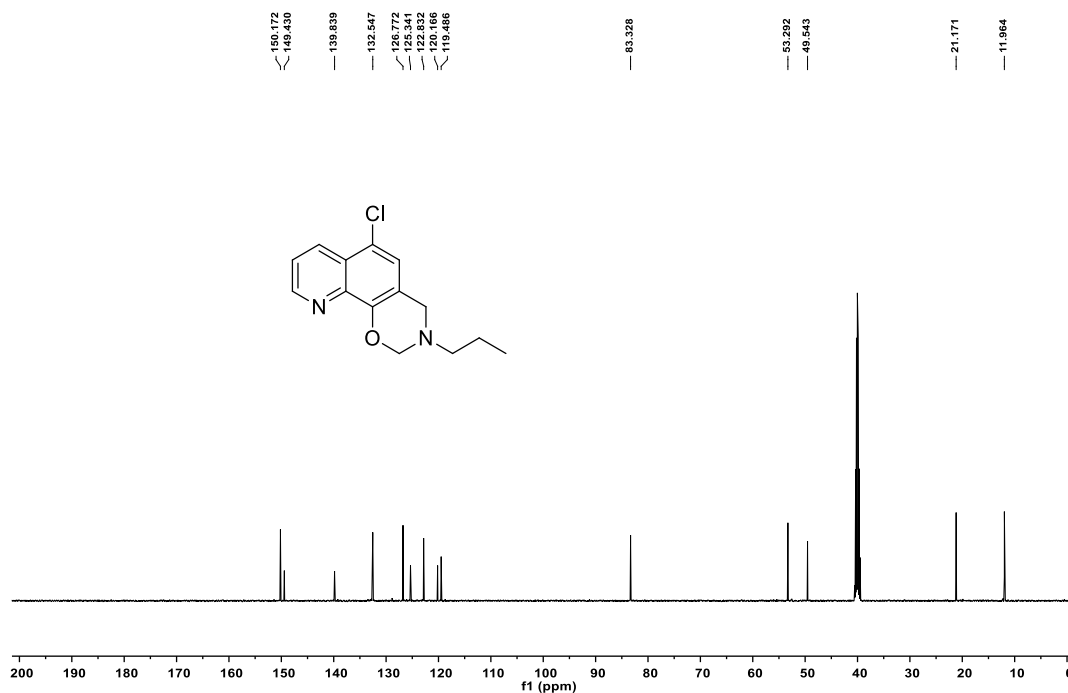

Figure S3. <sup>1</sup>H NMR (top) and <sup>13</sup>C NMR (bottom) of 5-Chloro-13-isopropyl-3,4-dihydro-2H-[1,3]oxazino-[5,6-h]quinoline (**4c**)

D-33

single\_pulse

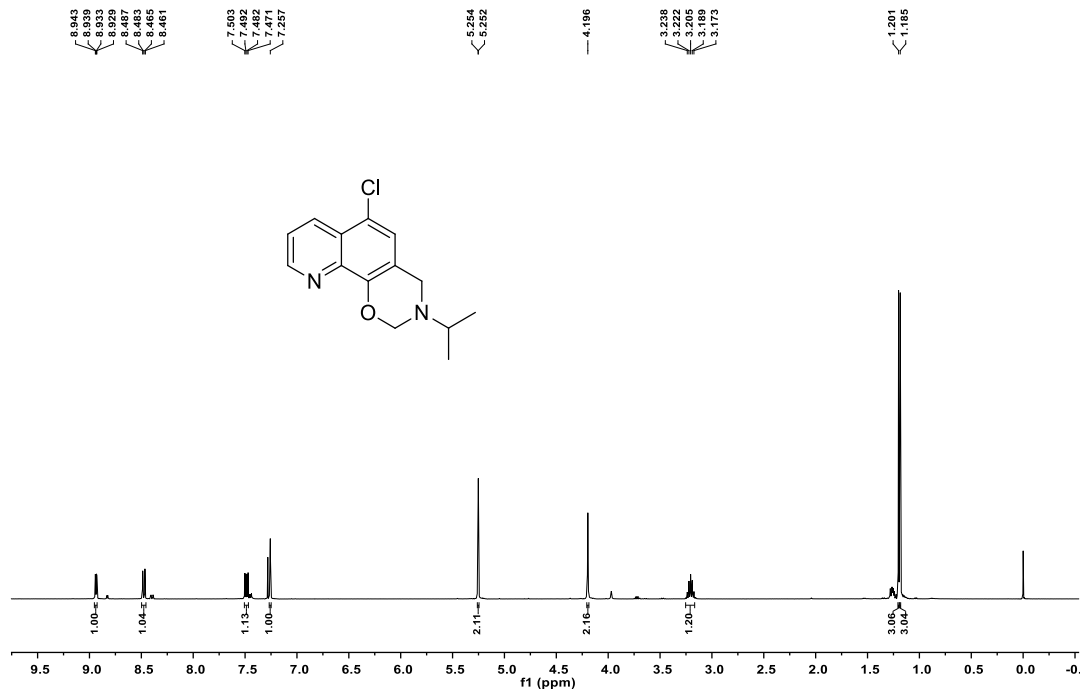

20140901 D-33  
 Bruker AVANCE111 400 20140901  
 C13 CDCl3 D:\DATA-2014 44

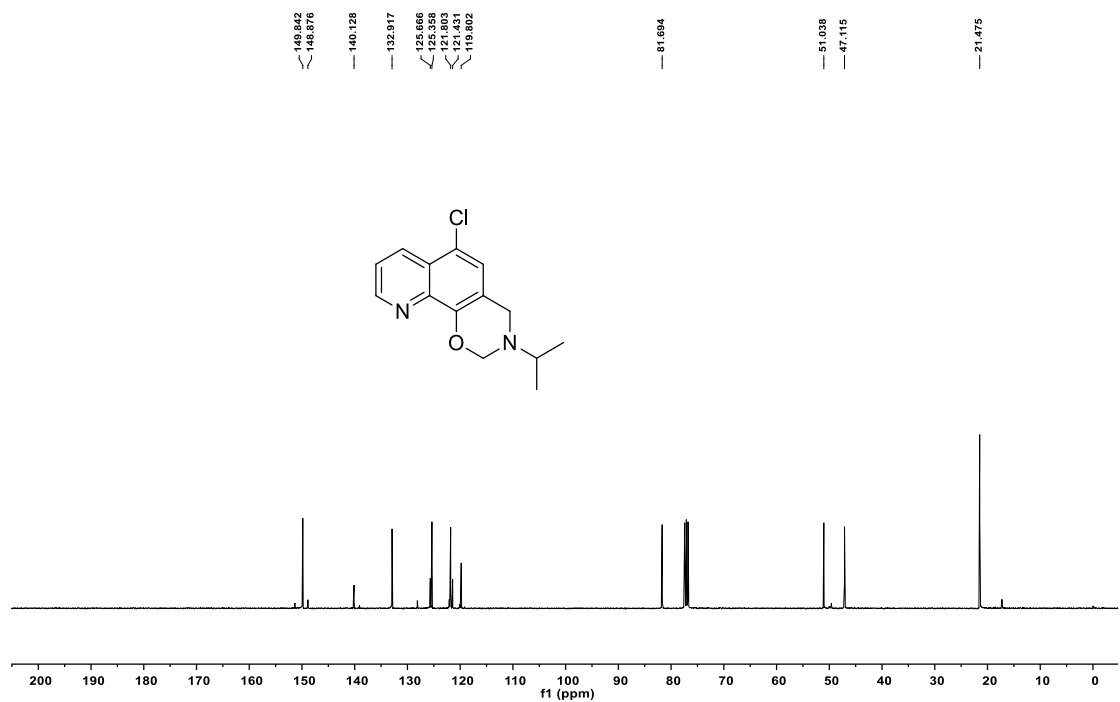

Figure S4. <sup>1</sup>H NMR (top) and <sup>13</sup>C NMR (bottom) of 5-Chloro-13-allyl-3, 4-dihydro-2H-[1, 3]oxazino-[5, 6-h]quinoline (**4d**)

D-28

single\_pulse

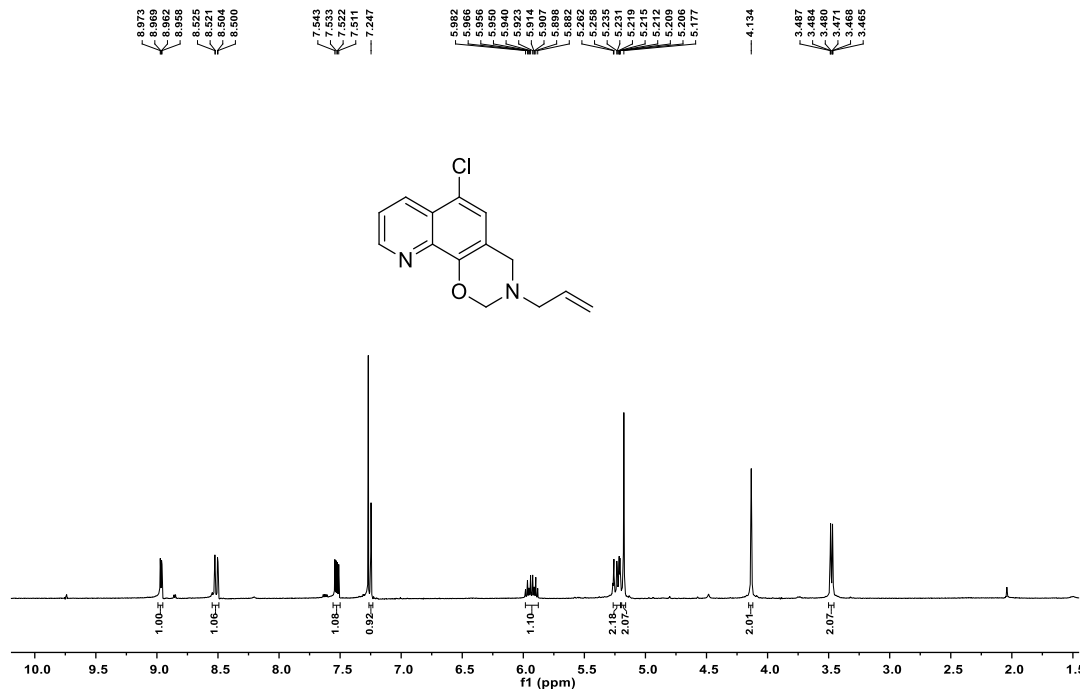

D-28

single pulse decoupled gated NOE

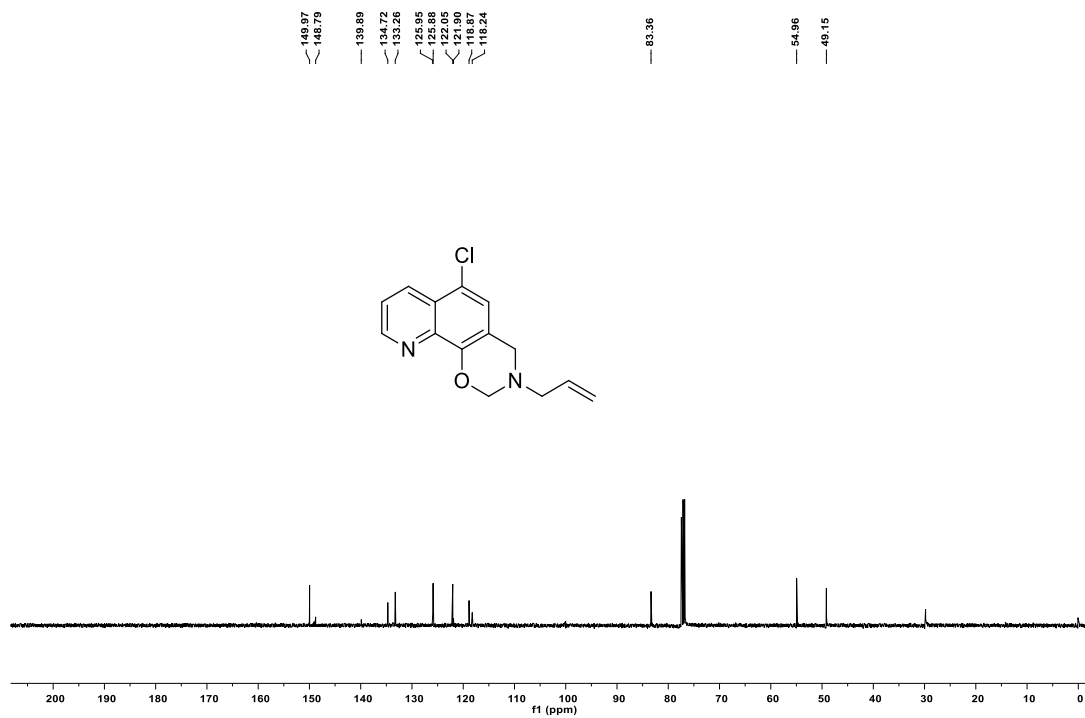

Figure S5.  $^1\text{H}$  NMR (top) and  $^{13}\text{C}$  NMR (bottom) of 5-Chloro-13-(prop-2-yn-1-yl)-3,4-dihydro-2H-[1,3]oxazino-[5,6-h]quinoline (**4e**)

20140702-D-22  
 BRUKER AV-111-500 1H-NMR D-22 IN DMSO 2014.07.02  
 PROTON DMSO E:\ kangjunsu 13

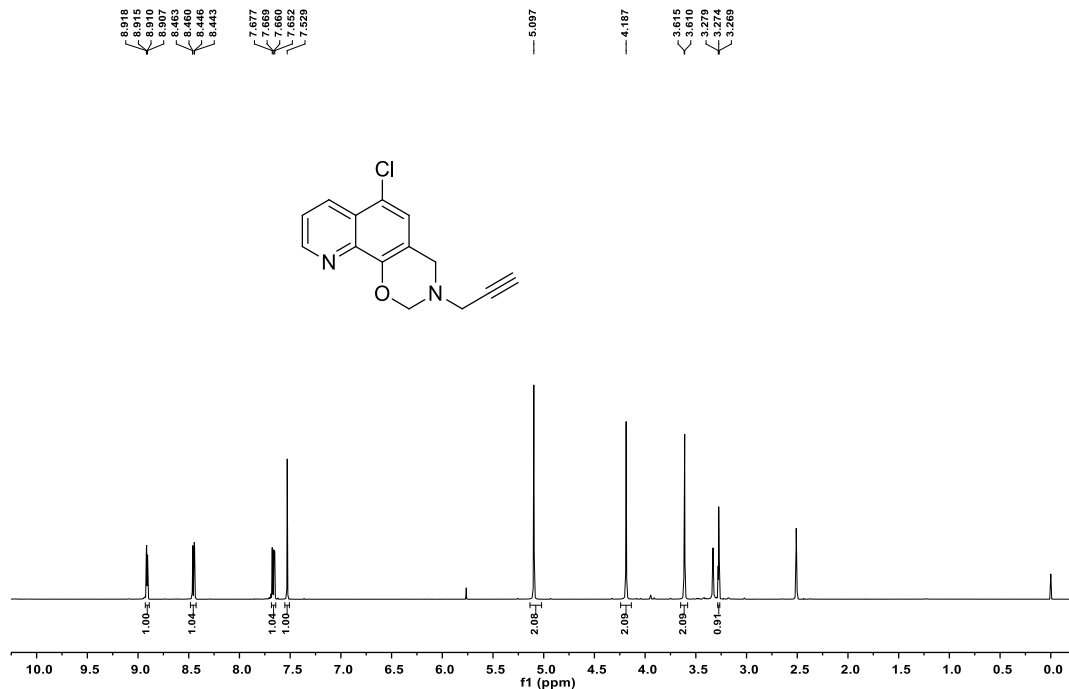

20140704-D-22  
 BRUKER AV-111-500 13C-NMR D-22 IN DMSO 2014.07.04  
 C13CPD DMSO E:\ kangjunsu 5

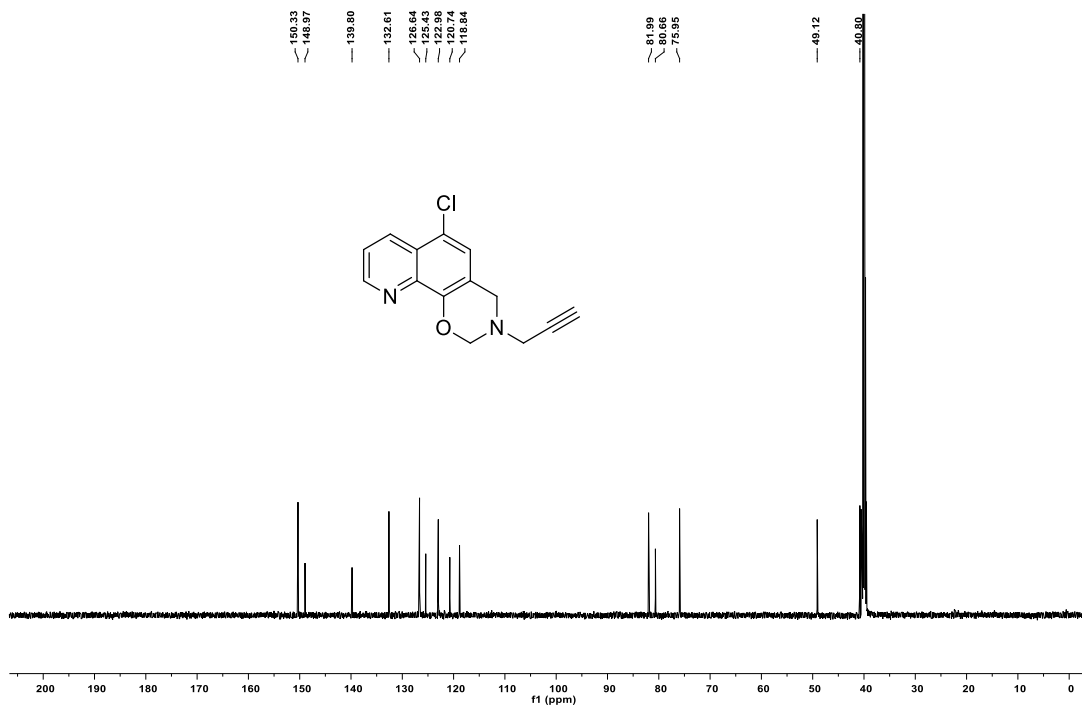

Figure S6.  $^1\text{H}$  NMR (top) and  $^{13}\text{C}$  NMR (bottom) of 5-Chloro-13-(2-dimethylaminoethyl)-3,4-dihydro-2H-[1,3]oxazino-[5,6-h]quinoline (**4f**)

D-31  
single\_pulse

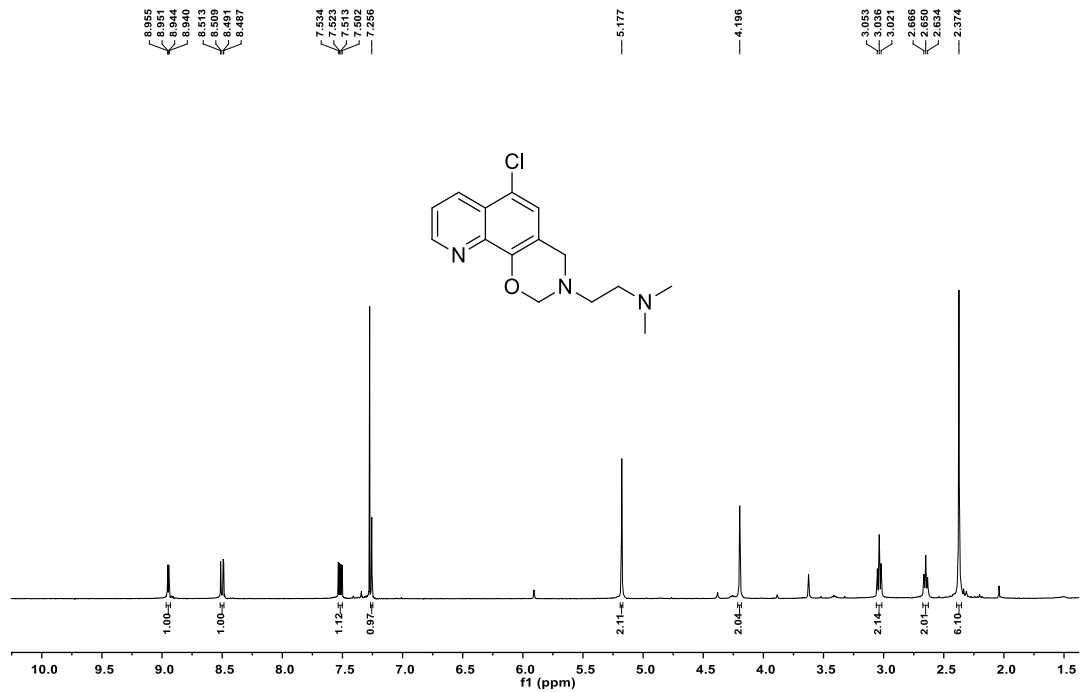

D-31  
single\_pulse decoupled gated NOE

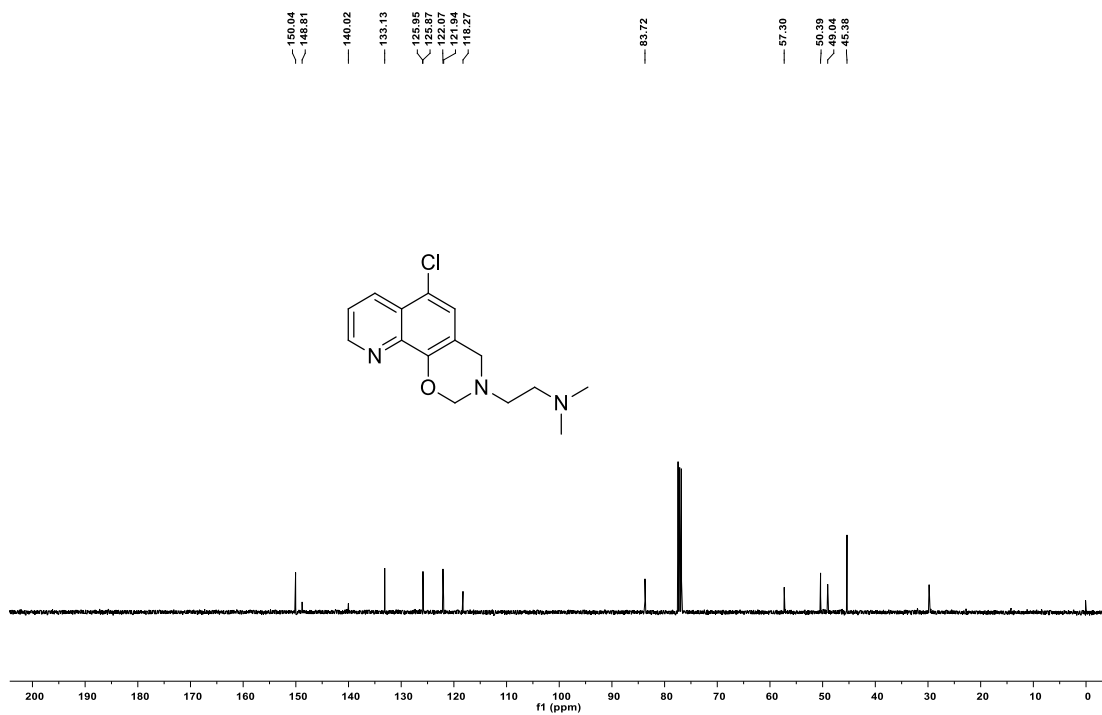

Figure S7. <sup>1</sup>H NMR (top) and <sup>13</sup>C NMR (bottom) of 5-Chloro-13-cyanoethyl-3,4-dihydro-2H-[1,3]oxazino[5,6-h]quinoline (4g)

20140825 D-40  
 Bruker AVANCE111 400 20140825  
 PROTON2 CDC13 D:\ \ DATA-2014 10

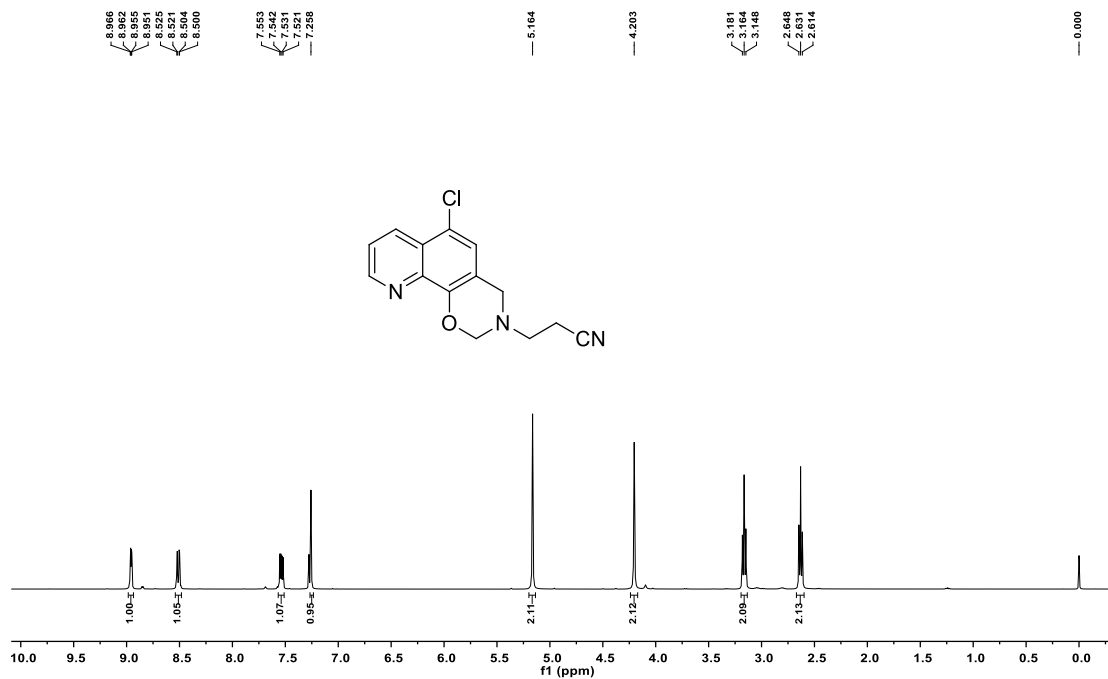

20140828 D-40  
 Bruker AVANCE111 400 20140828  
 C13 CDC13 D:\ \ DATA-2014 30

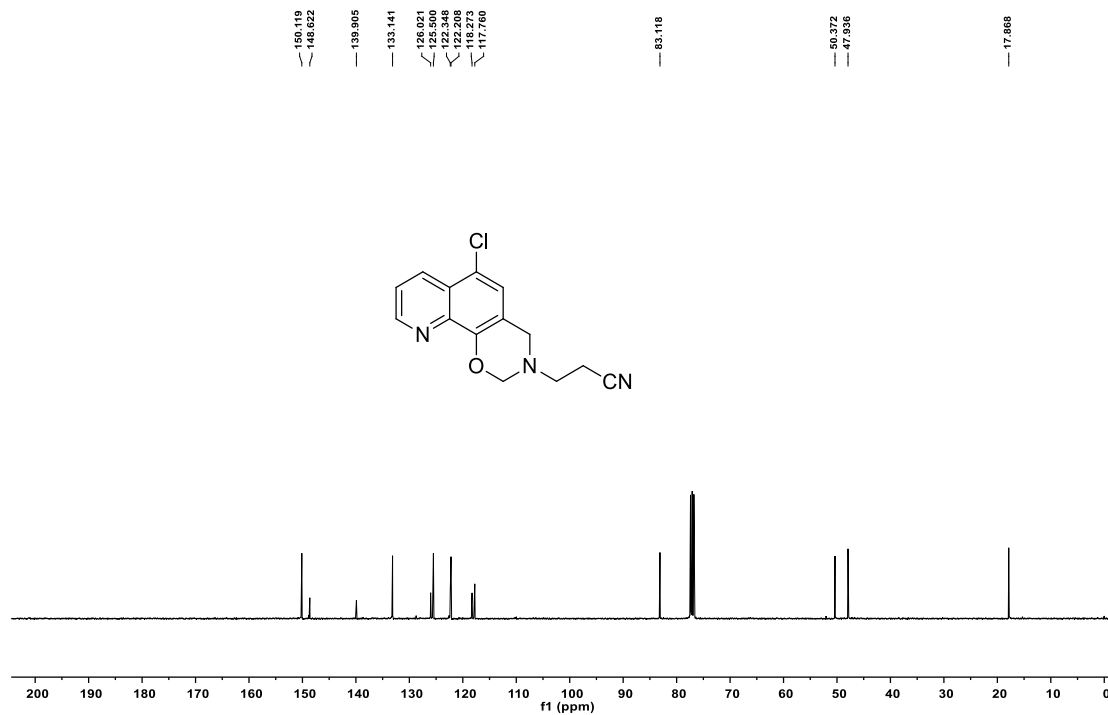



Figure S8.  $^1\text{H}$  NMR (top) and  $^{13}\text{C}$  NMR (bottom) of 5-Chloro-13-methoxycarbonylmethyl-3,4-dihydro-2H-[1,3]oxazino[5,6-h]quinoline (**4h**)

20140708-D-24  
 BRUKER AV-111-500 1H-NMR D-24 IN DMSO 2014.07.08  
 PROTON DMSO E:\\ songdanqing 39

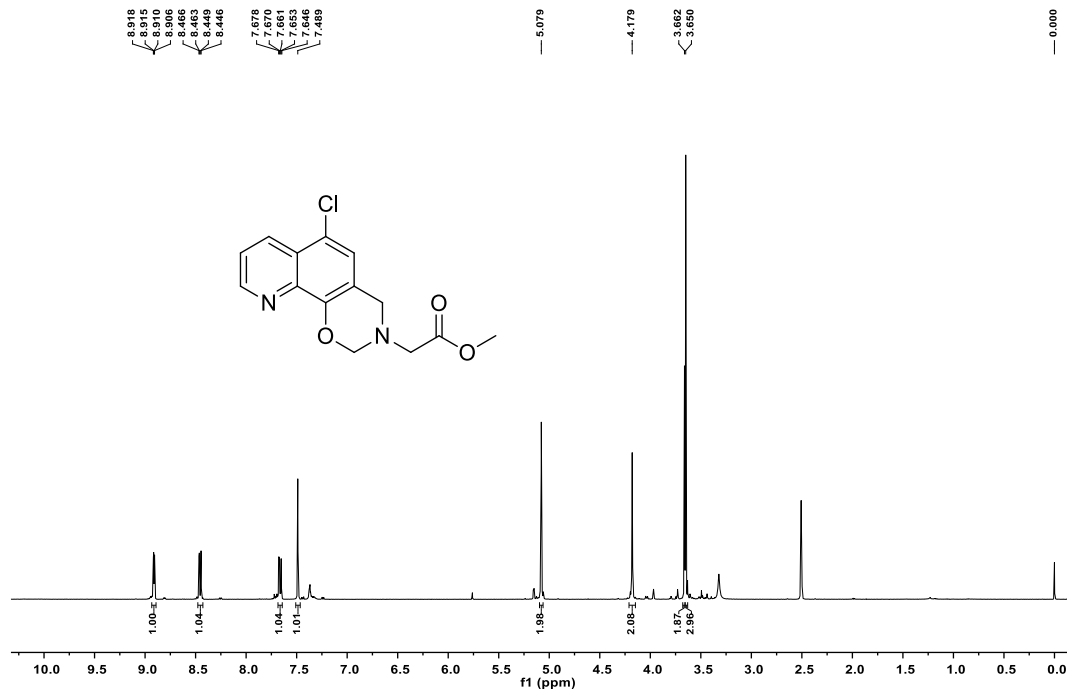

20140709-D-24  
 BRUKER AV-111-500 13C-NMR D-24 IN DMSO 2014.07.09  
 C13CPD DMSO E:\\ songdanqing 58

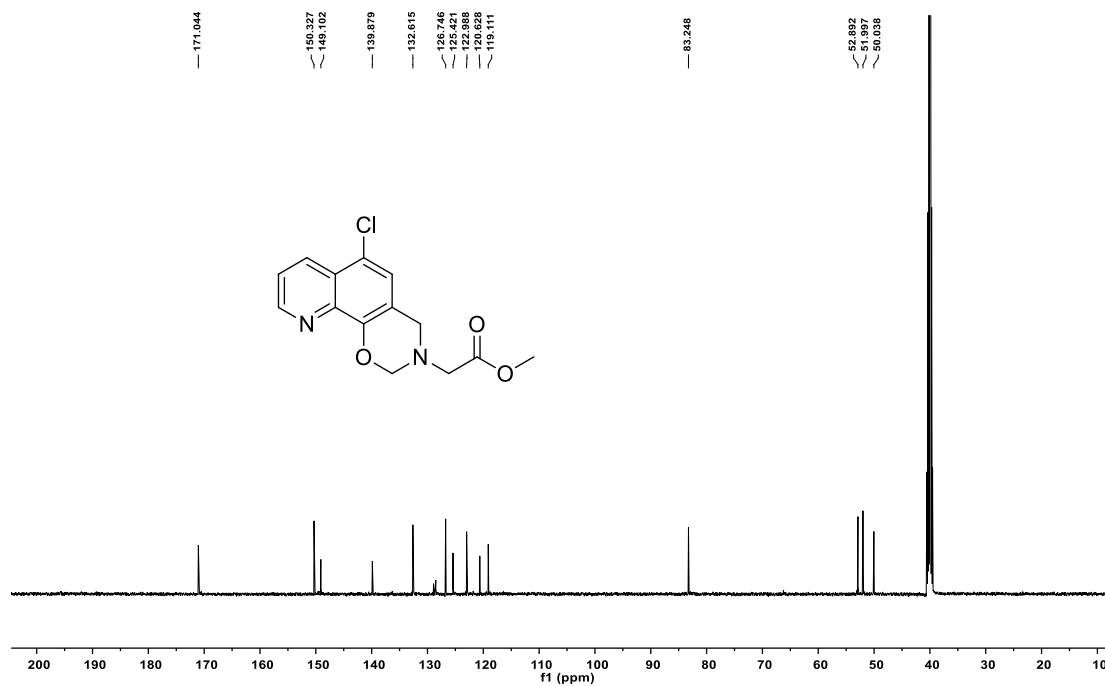

Figure S9. <sup>1</sup>H NMR (top) and <sup>13</sup>C NMR (bottom) of 5-Chloro-13-benzoxycarbonylmethyl-3,4-dihydro-2H-[1,3]oxazino[5,6-h]quinoline (**4i**)

20140825 D-27  
 Bruker AVANCE111 400 20140825  
 PROTON2 CDC13 D:\ DATA-2014 11

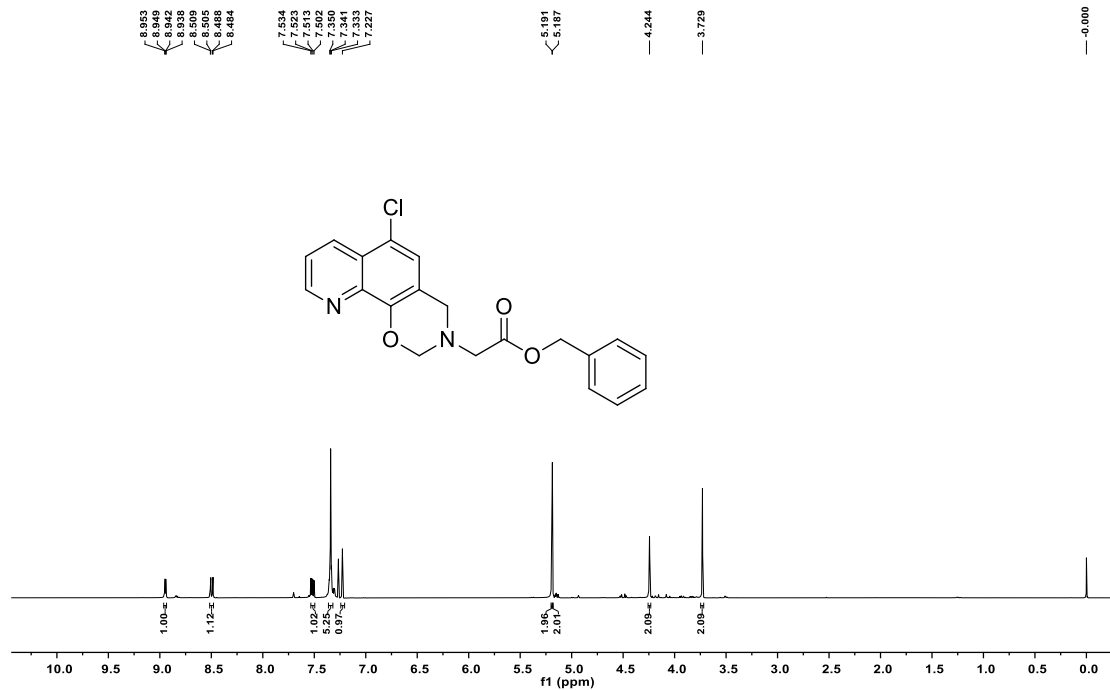

20140828 D-27  
 Bruker AVANCE111 400 20140828  
 C13 CDC13 D:\ DATA-2014 27

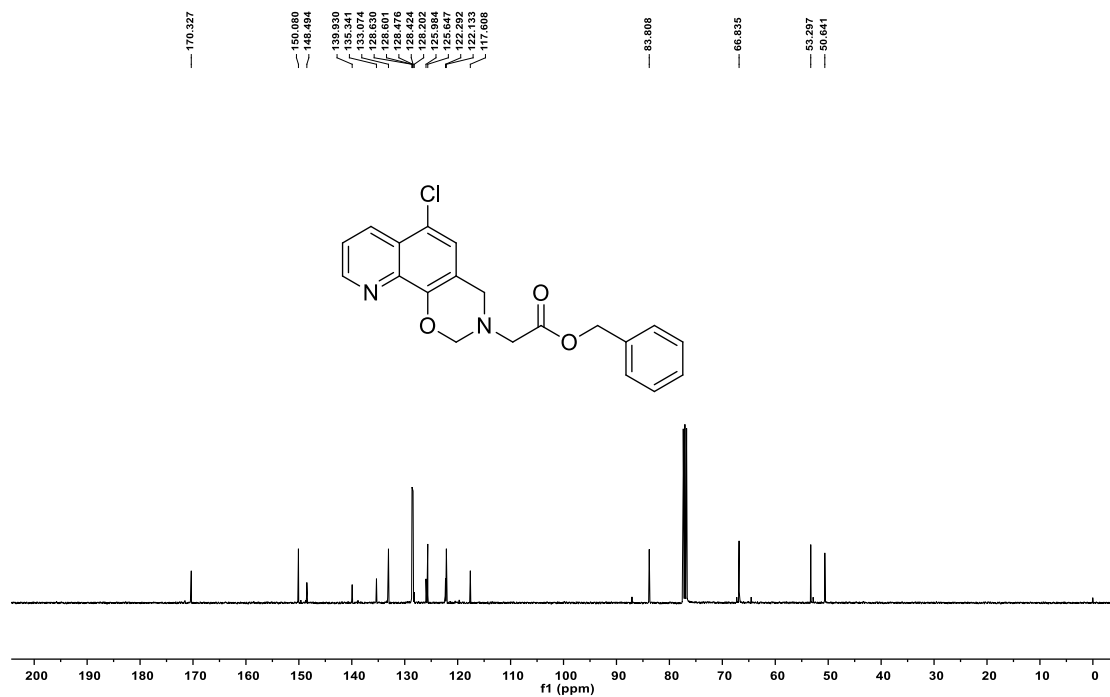

Figure S10.  $^1\text{H}$  NMR (top) and  $^{13}\text{C}$  NMR (bottom) of 5-Chloro-13-cyclopropyl-3,4-dihydro-2H-[1,3]oxazino[5,6-h]quinoline (**4j**)

D-34  
single\_pulse

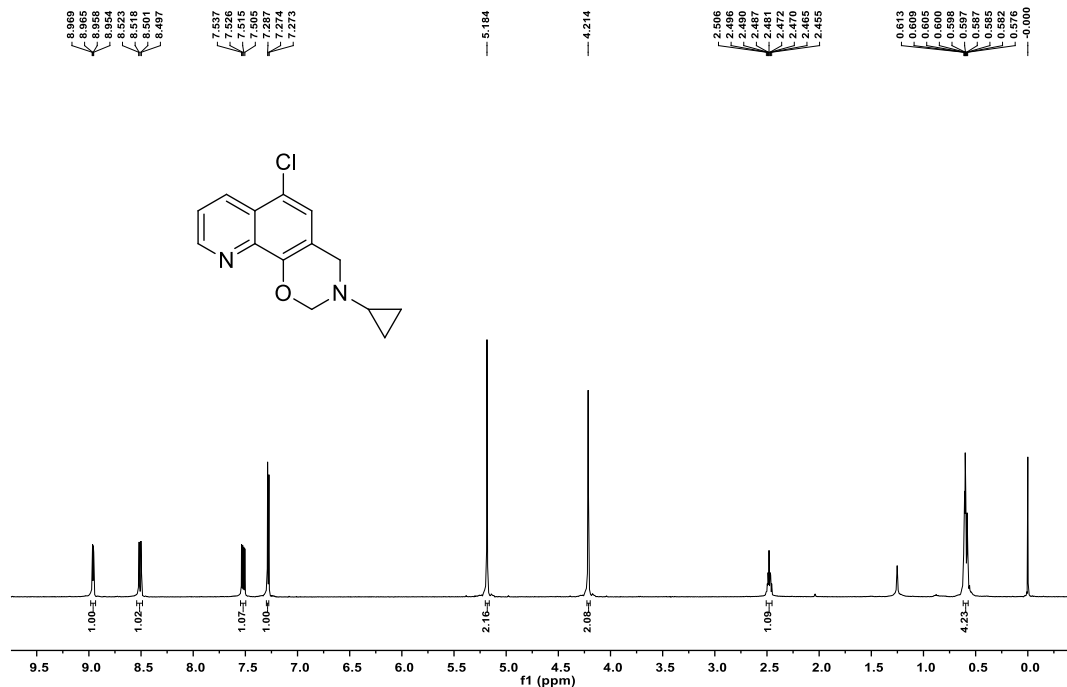

D-34  
single\_pulse decoupled gated NOE

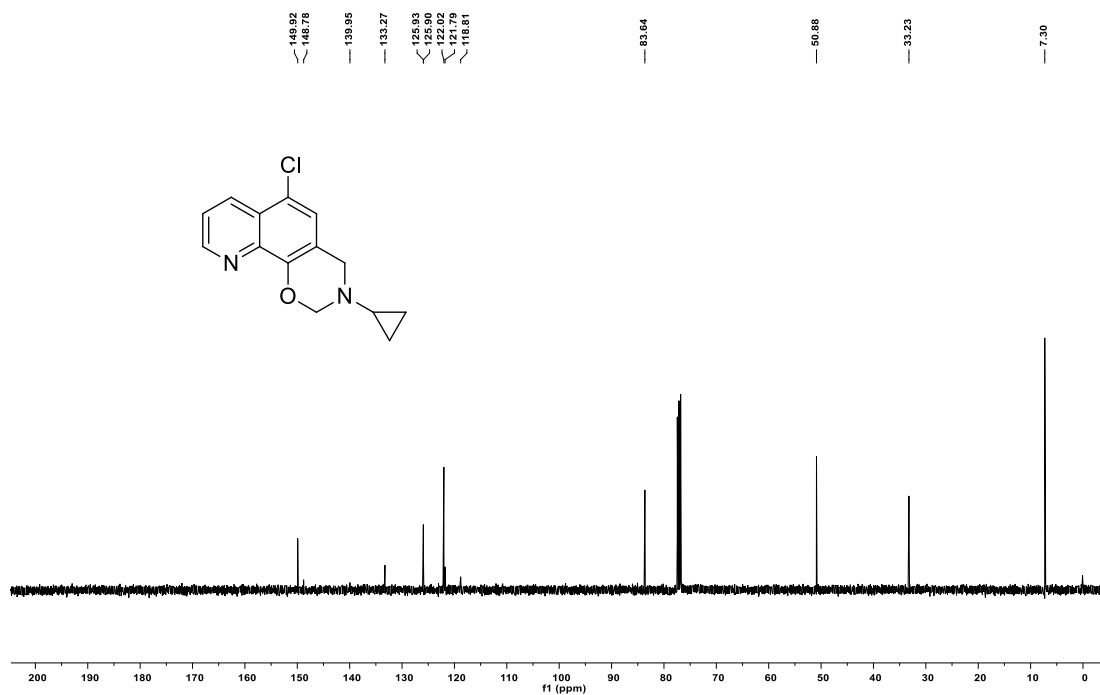

Figure S11.  $^1\text{H}$  NMR (top) and  $^{13}\text{C}$  NMR (bottom) of 5-Chloro-13-[2-(pyrrolidin-1-yl)ethyl]-3,4-dihydro-2H-[1,3]oxazino[5,6-h]quinoline (**4k**)

D-36

single\_pulse

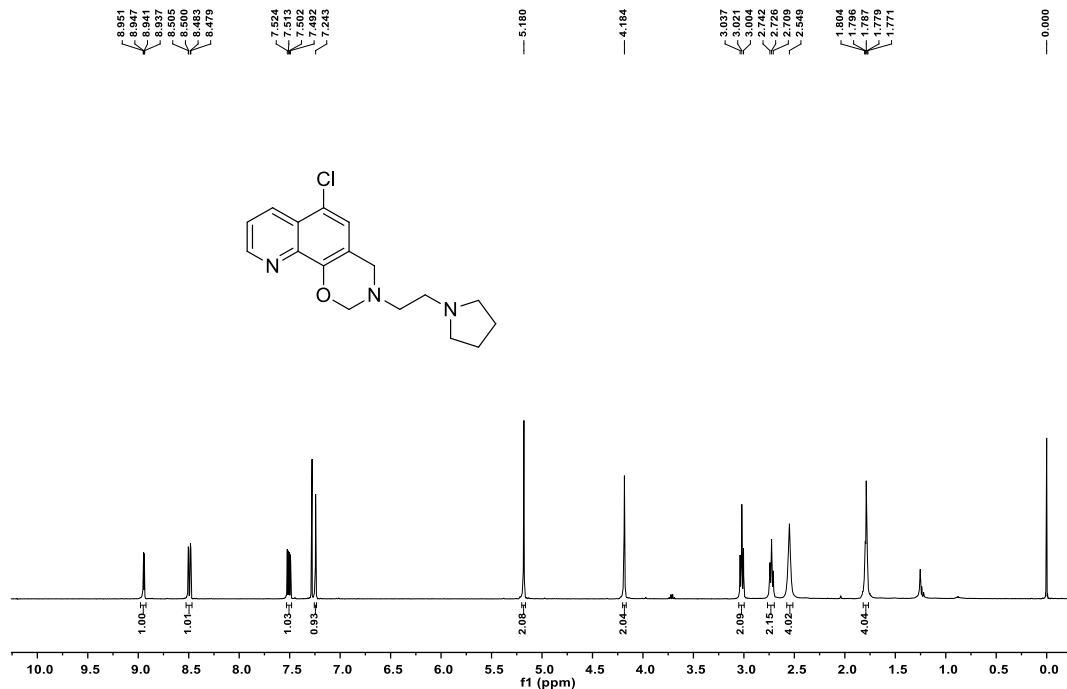

D-36

single\_pulse decoupled gated NOE

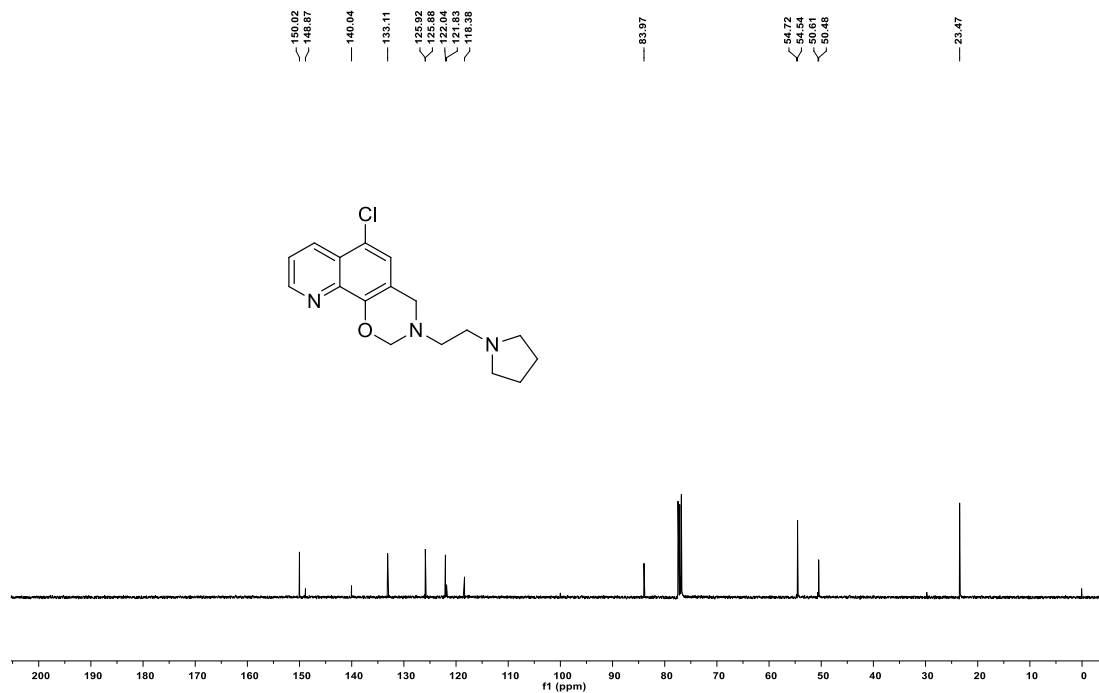

Figure S12.  $^1\text{H}$  NMR (top) and  $^{13}\text{C}$  NMR (bottom) of 5-Chloro-13-[(tetrahydro-2H-pyran-4-yl)methyl]-3,4-dihydro-2H-[1,3]oxazino[5,6-h]quinoline (**4I**)

D-29

single\_pulse

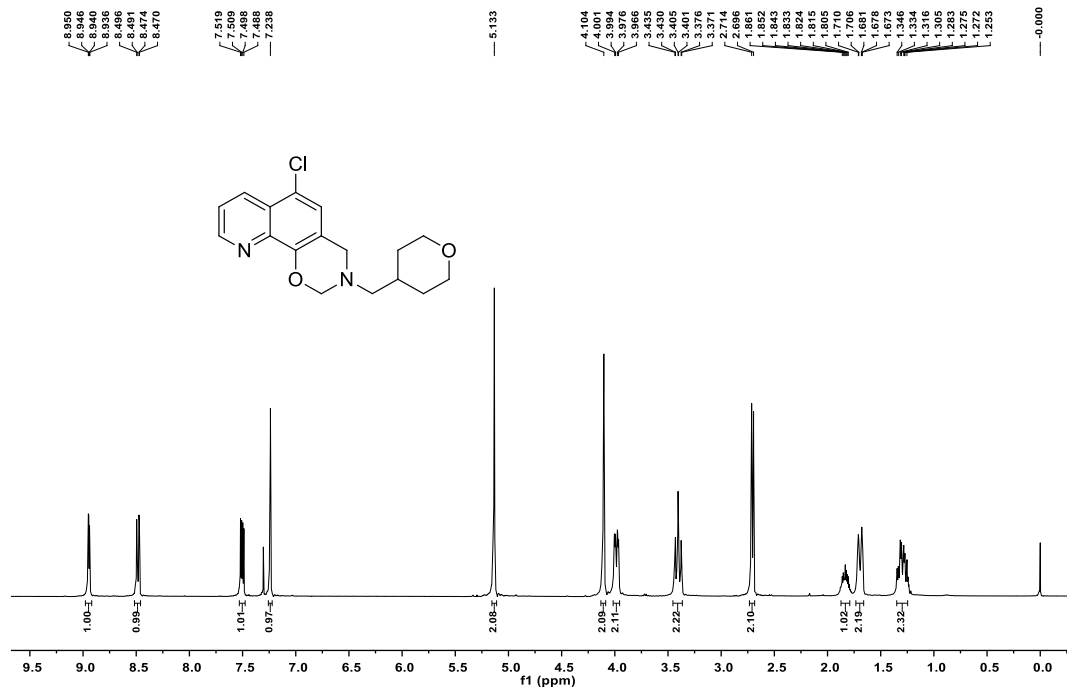

D-29

single\_pulse decoupled gated NOE

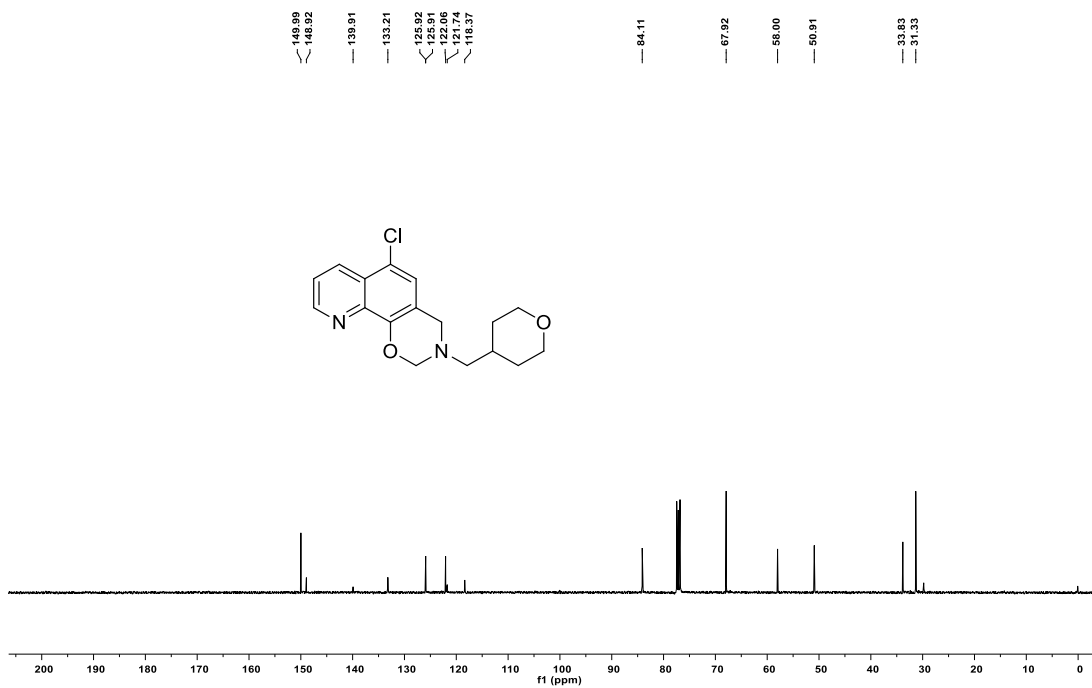

Figure S13.  $^1\text{H}$  NMR (top) and  $^{13}\text{C}$  NMR (bottom) of 5-Chloro-13-morpholinopropyl-3,4-dihydro-2H-[1,3]oxazino[5,6-h]quinoline (**4m**)

D-35

single\_pulse

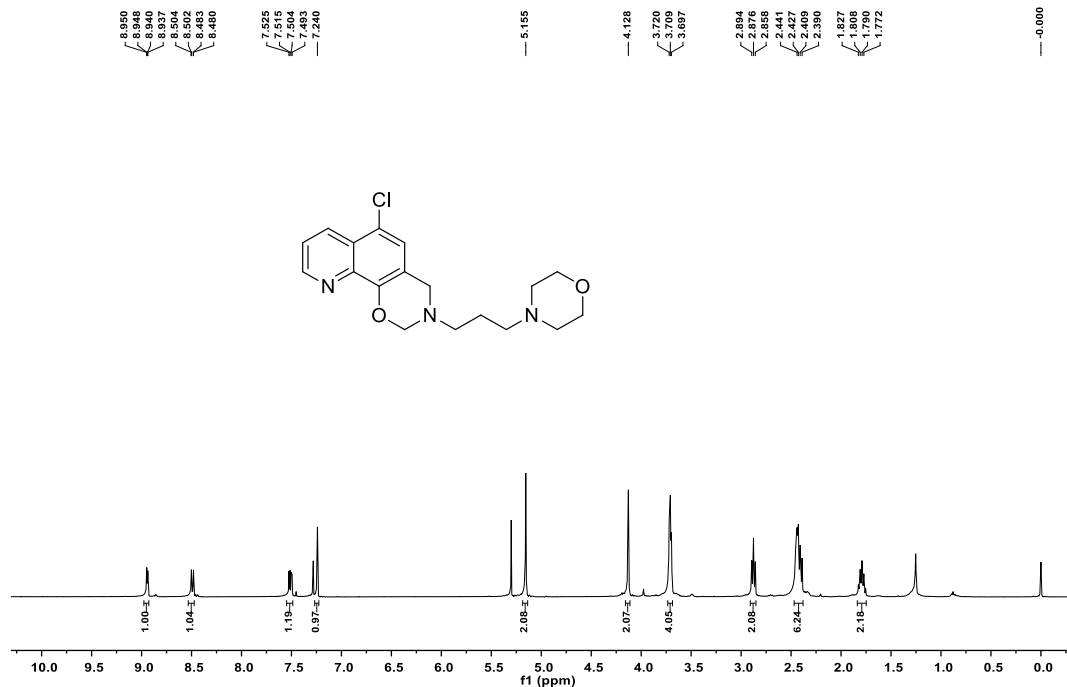

D-35

single pulse decoupled gated NOE

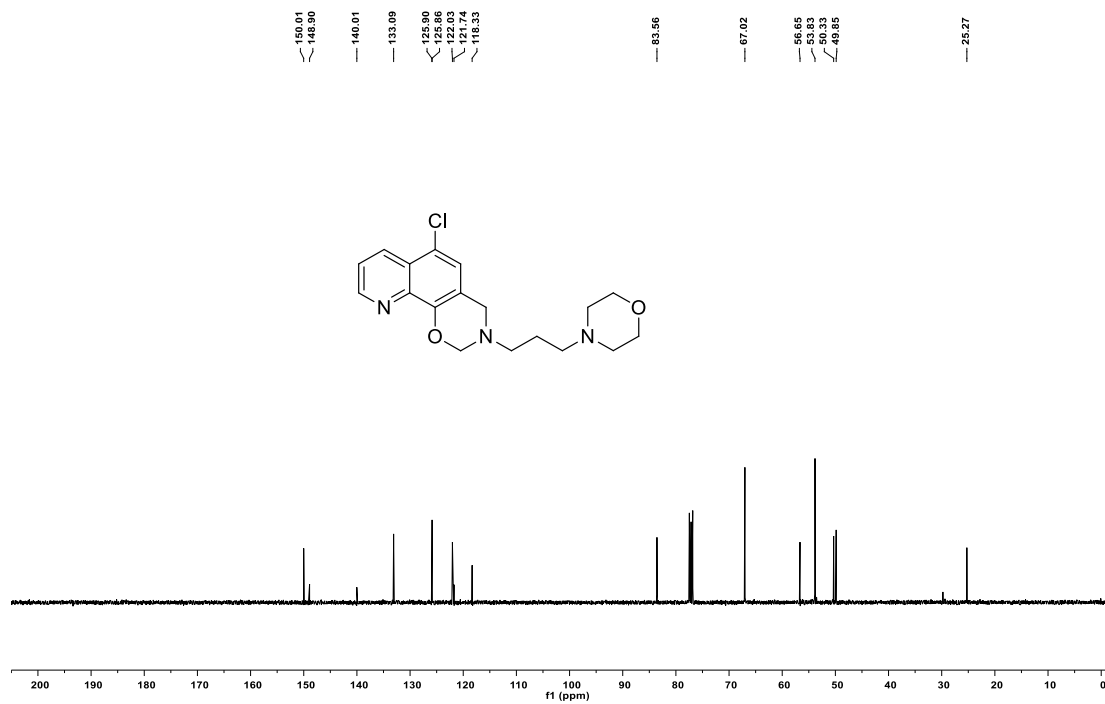

Figure S14. <sup>1</sup>H NMR (top) and <sup>13</sup>C NMR (bottom) of 5-Chloro-7-(pyrrolidin-1-yl-methyl)quinolin-8-ol

(5a)

20140828 D-52  
 Bruker AVANCE111 400 20140828  
 PROTON2 CDC13 D:\ DATA-2014 4

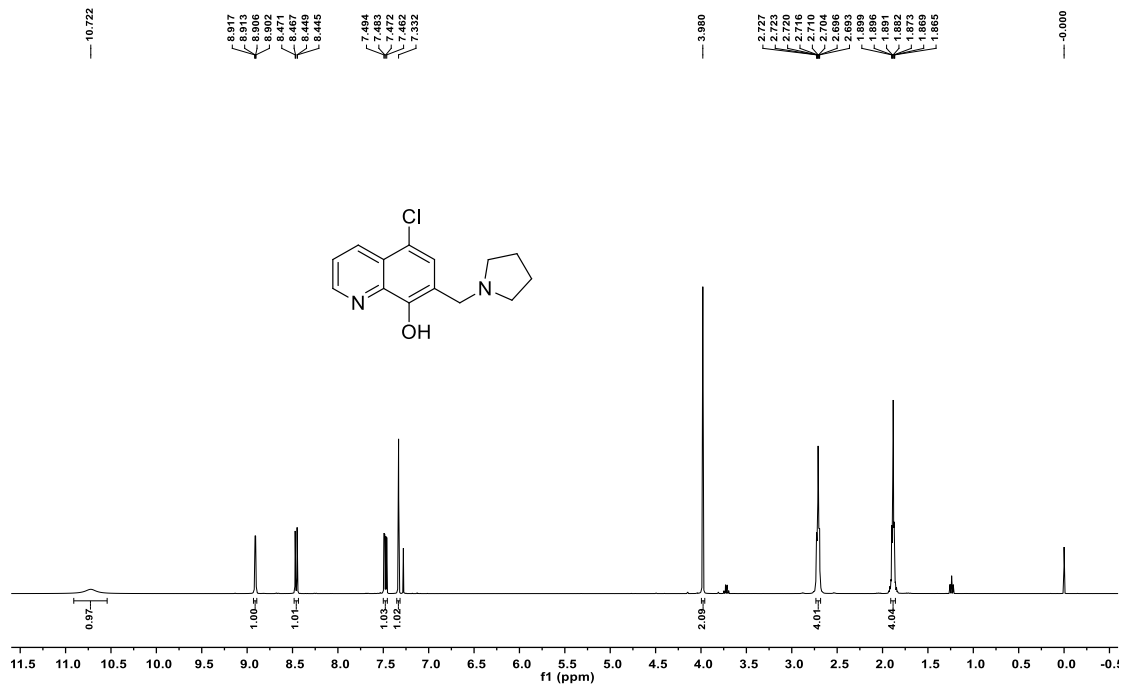

20140901 D-52  
 Bruker AVANCE111 400 20140901  
 C13 CDC13 D:\ DATA-2014 42

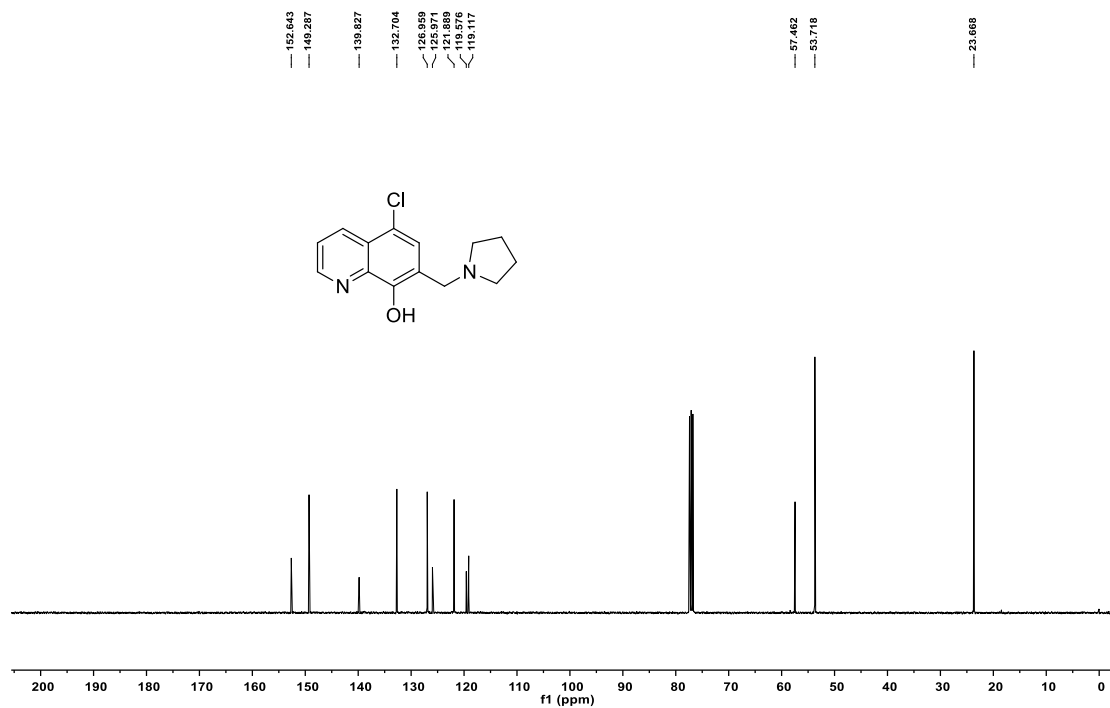

Figure S15.  $^1\text{H}$  NMR (top) and  $^{13}\text{C}$  NMR (bottom) of 5-Chloro-7-(morpholinomethyl)quinolin-8-ol (**5b**)

20140826 D-51  
 Bruker AVANCE111 400 20140826  
 PROTON2 CDC13 D:\ \ DATA-2014 6

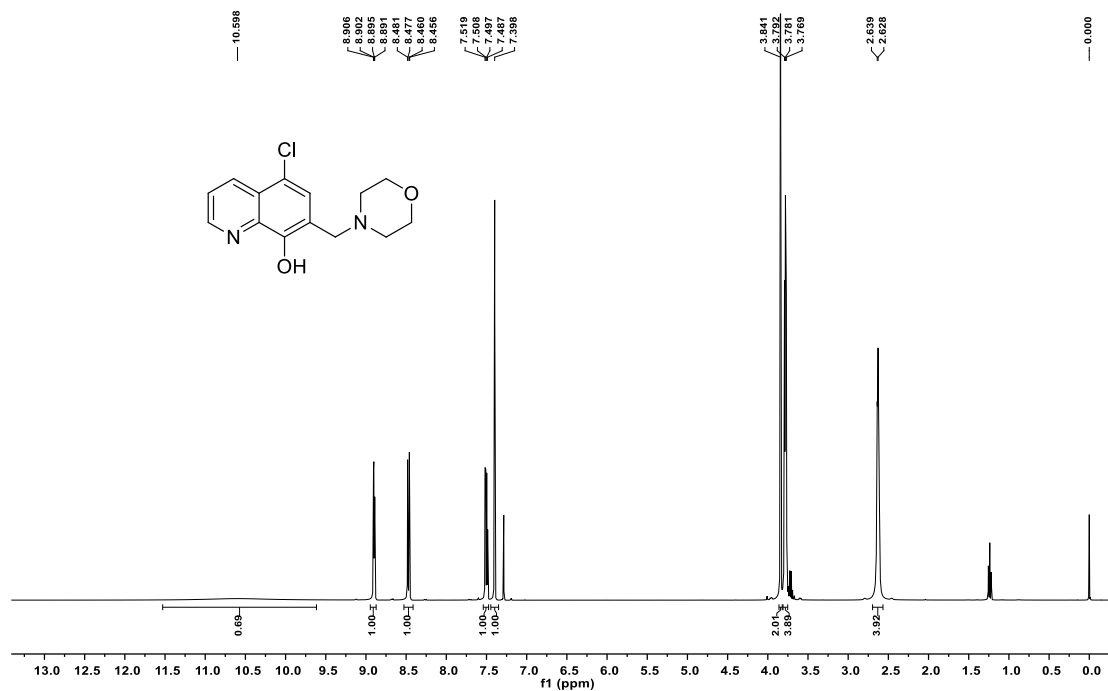

20140828 D-51  
 Bruker AVANCE111 400 20140828  
 C13 CDC13 D:\ \ DATA-2014 26

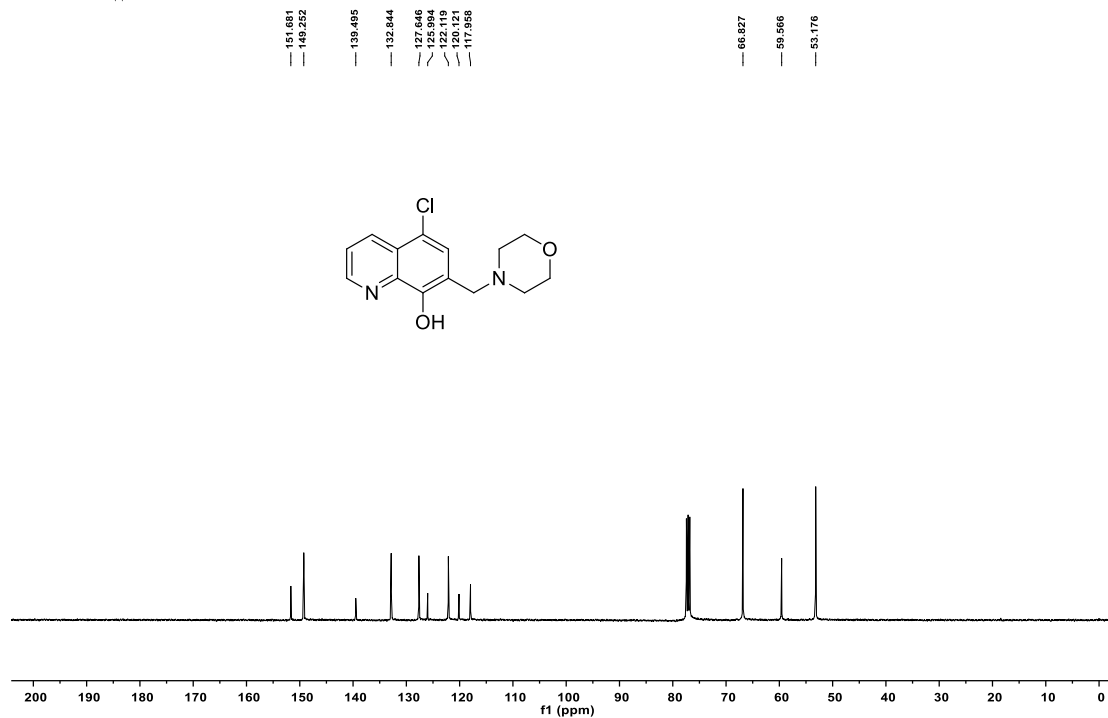



Figure S16. <sup>1</sup>H NMR (top) and <sup>13</sup>C NMR (bottom) of 5-Chloro-7-[(4-methylpiperazin-1-yl)methyl]quinolin-8-ol (5c)

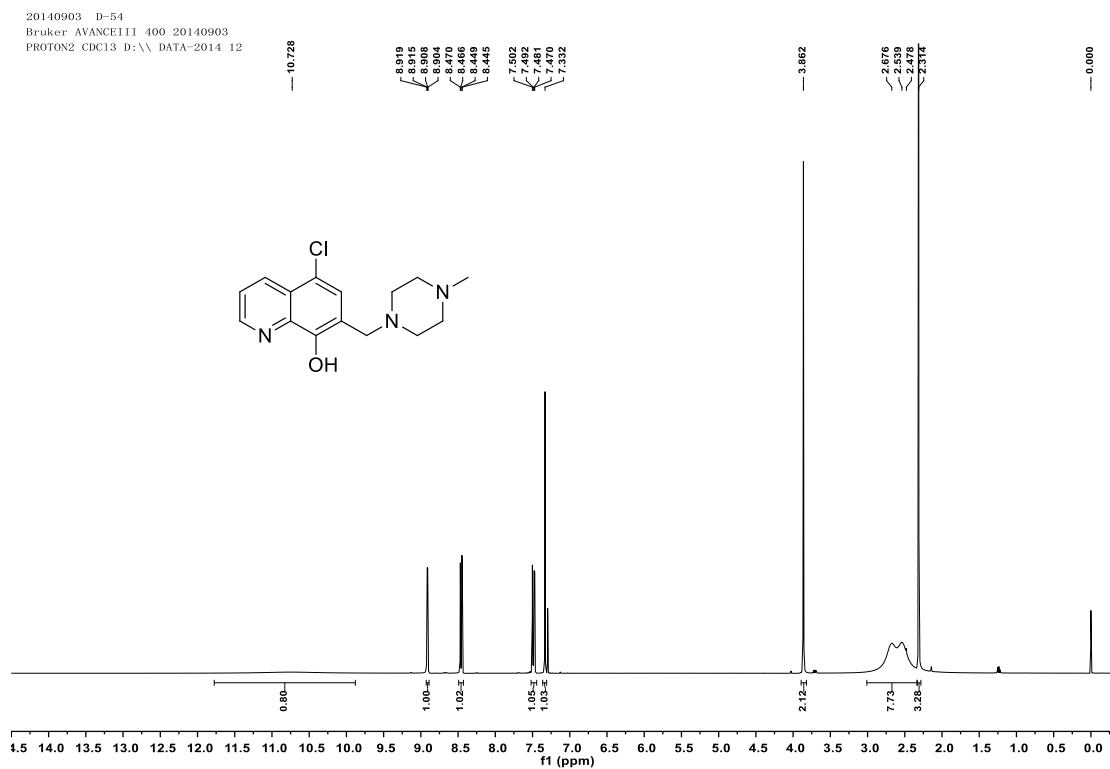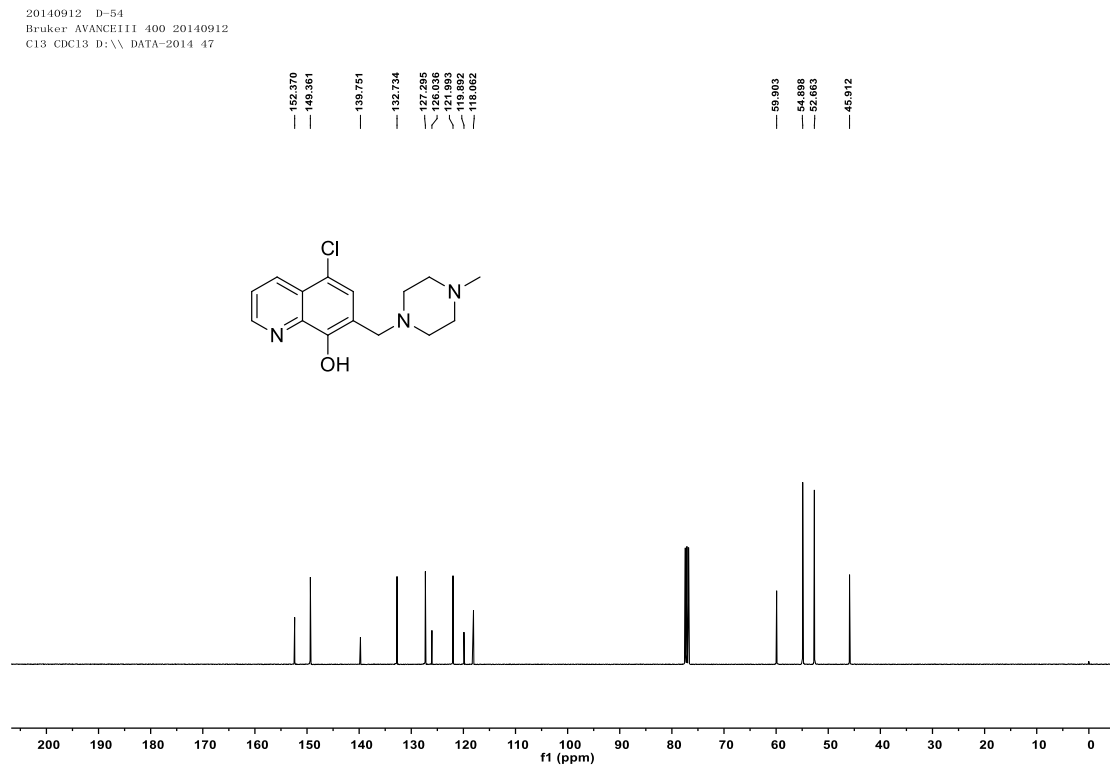

Figure S17.  $^1\text{H}$  NMR (top) and  $^{13}\text{C}$  NMR (bottom) of 7-[4-[(5-chloro-8-hydroxyquinolin-7-yl)methyl]piperazin-1-yl]-1-cyclopropyl-6-fluoro-4-oxo-1,4-dihydro-1,8-naphthyridine-3-carboxylic acid (**5d**)

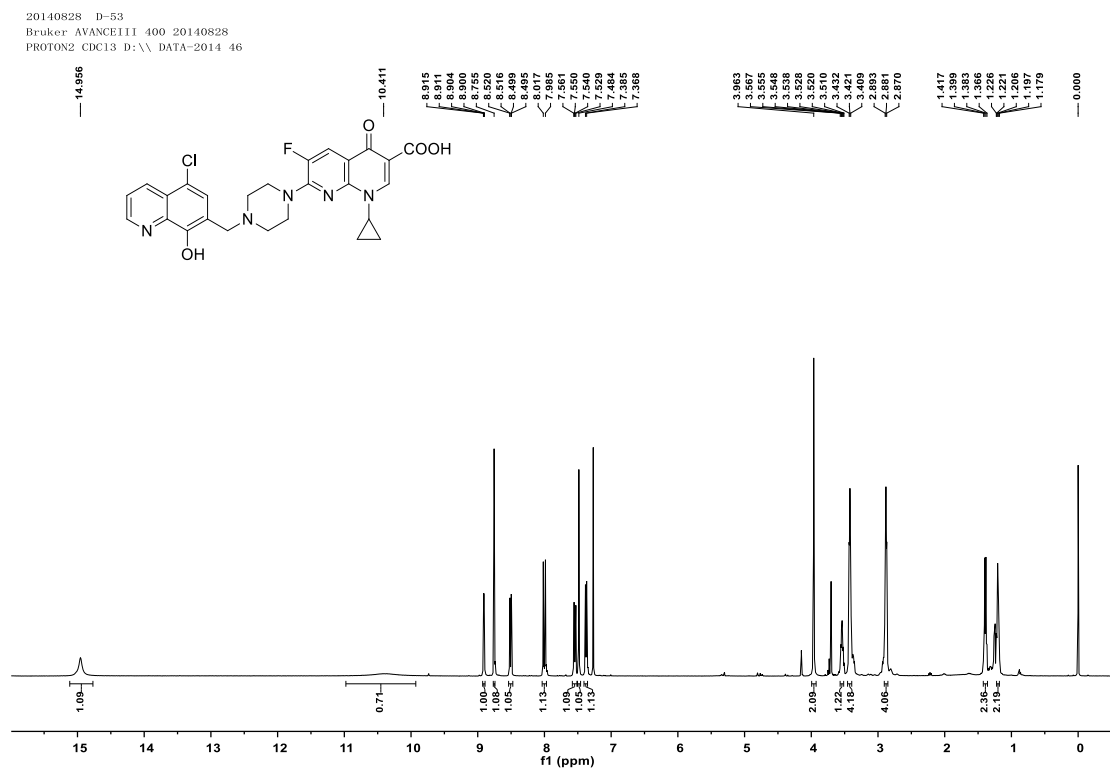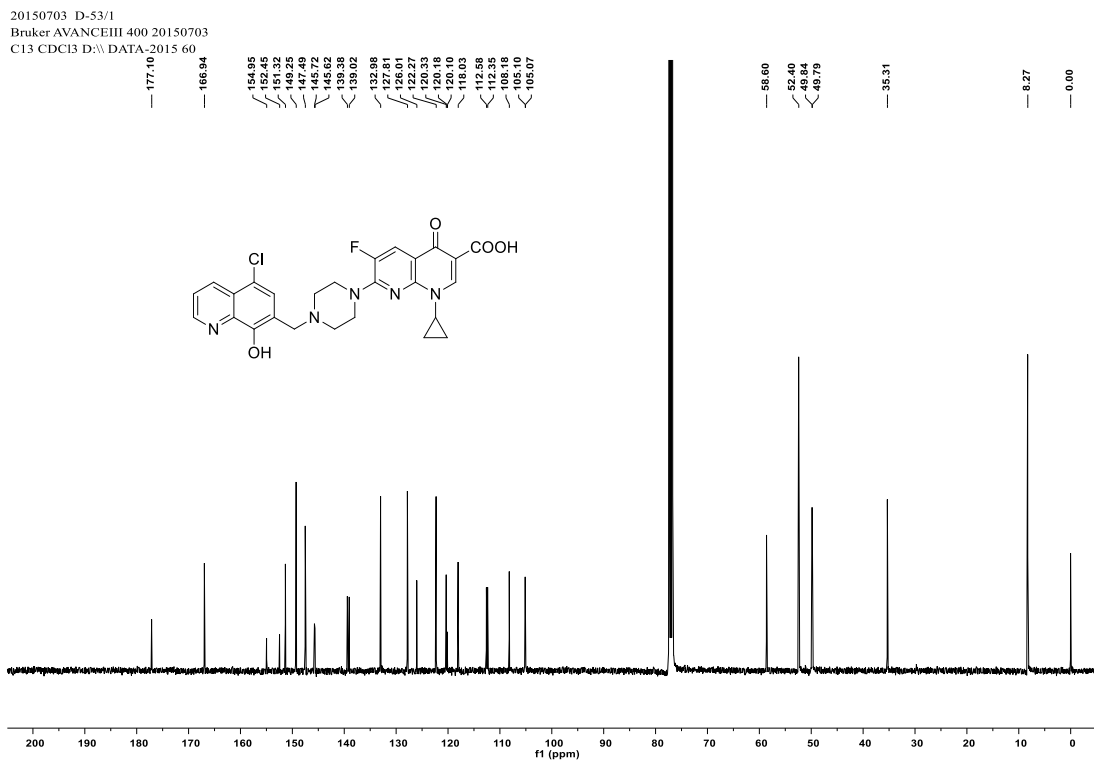

Figure S18. <sup>1</sup>H NMR (top) and <sup>13</sup>C NMR (bottom) of 7,7'-[[3-ethoxypropyl)azanediy]bis(methylene)]bis(5-chloroquinolin-8-ol) (**6a**)

20140825 D-37  
 Bruker AVANCE111 400 20140825  
 PROTON2 CDC13 D:\ \ DATA-2014 8

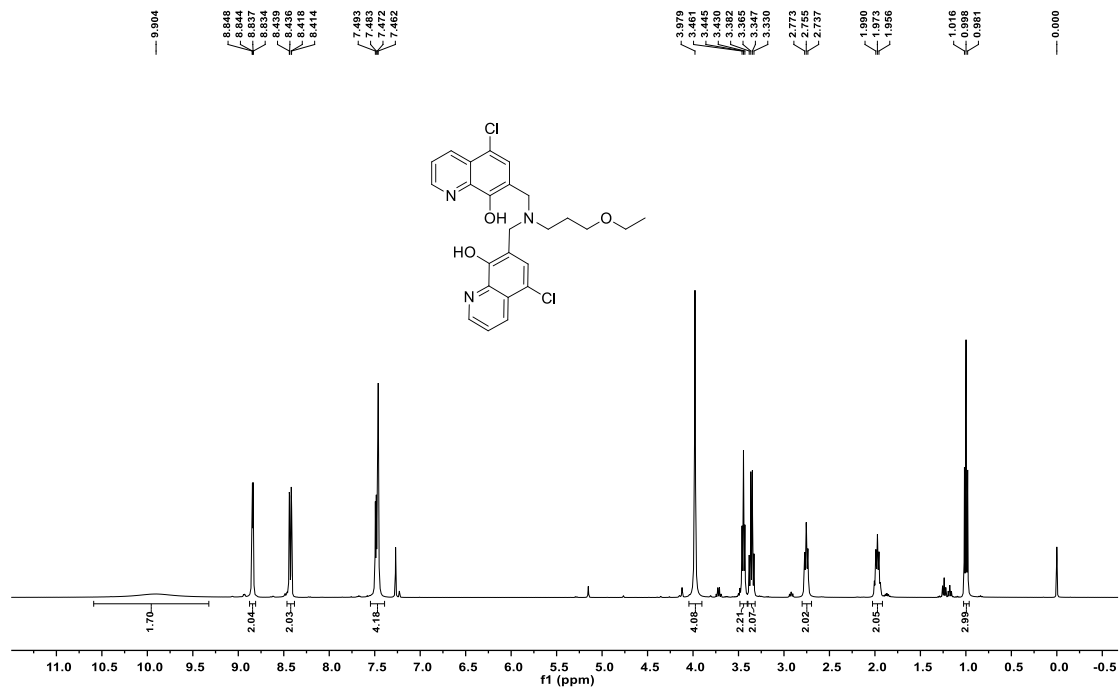

20140828 D-37A  
 Bruker AVANCE111 400 20140828  
 C13 CDC13 D:\ \ DATA-2014 29

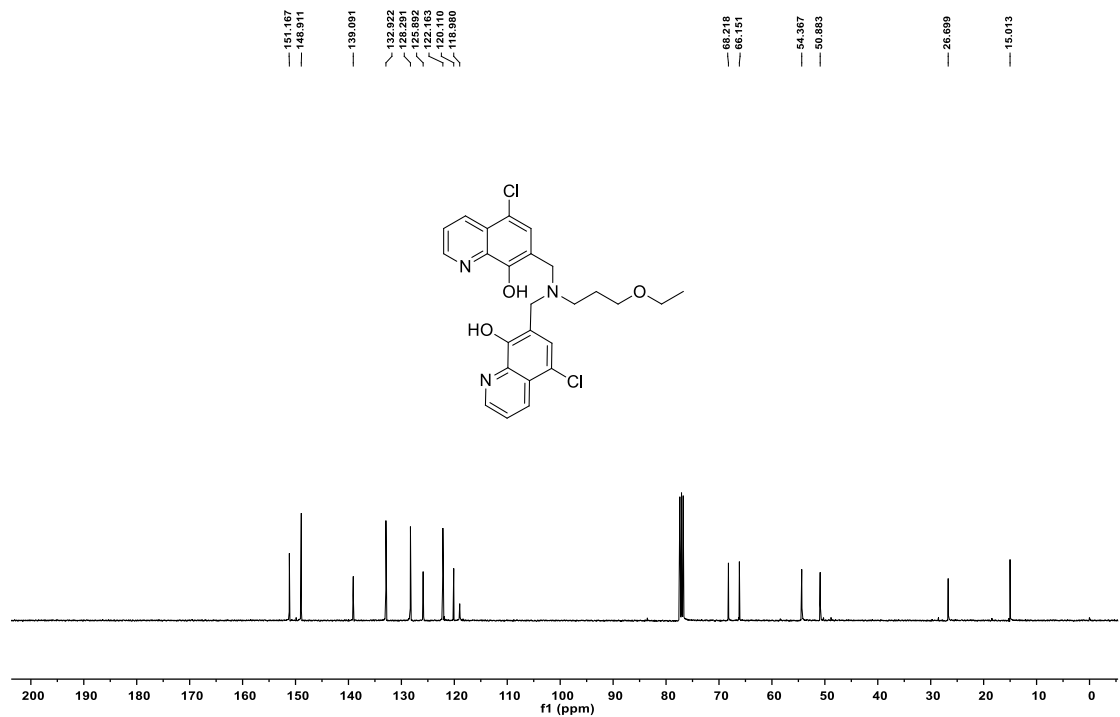

Figure S19.  $^1\text{H}$  NMR (top) and  $^{13}\text{C}$  NMR (bottom) of (*S*)-ethyl-2-[bis[(5-chloro-8-hydroxyquinolin-7-yl)methyl]amino]-3-phenylpropanoate (**6b**)

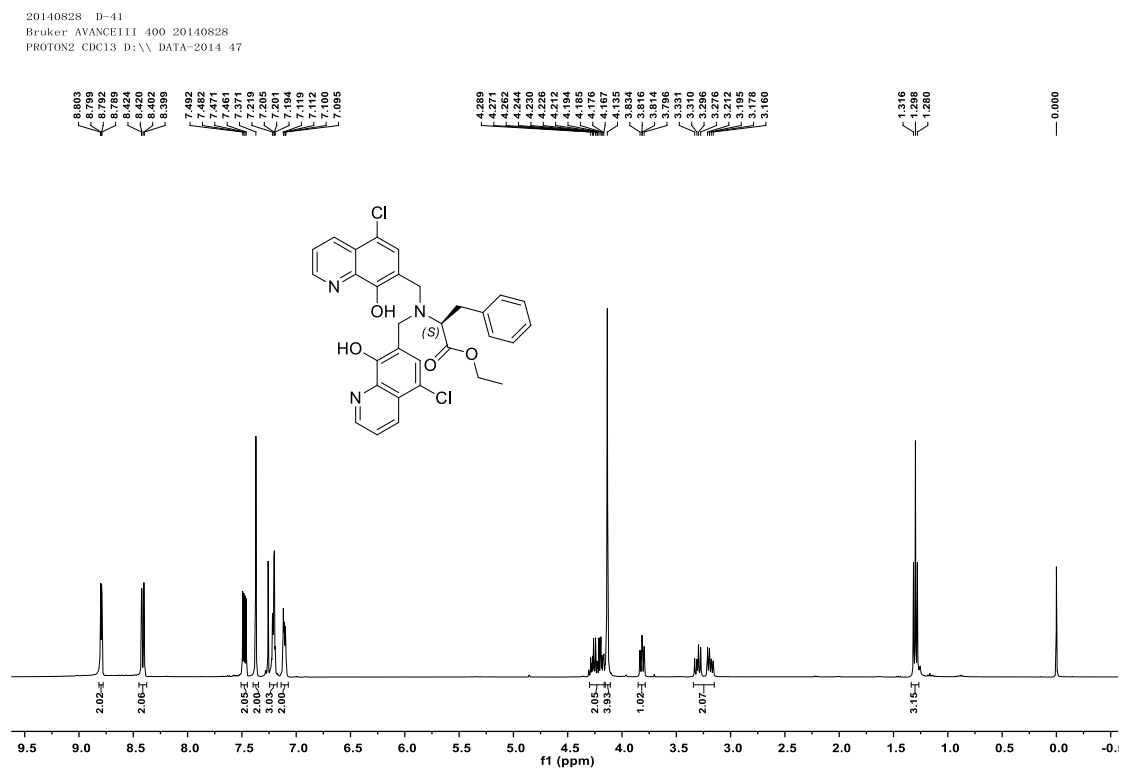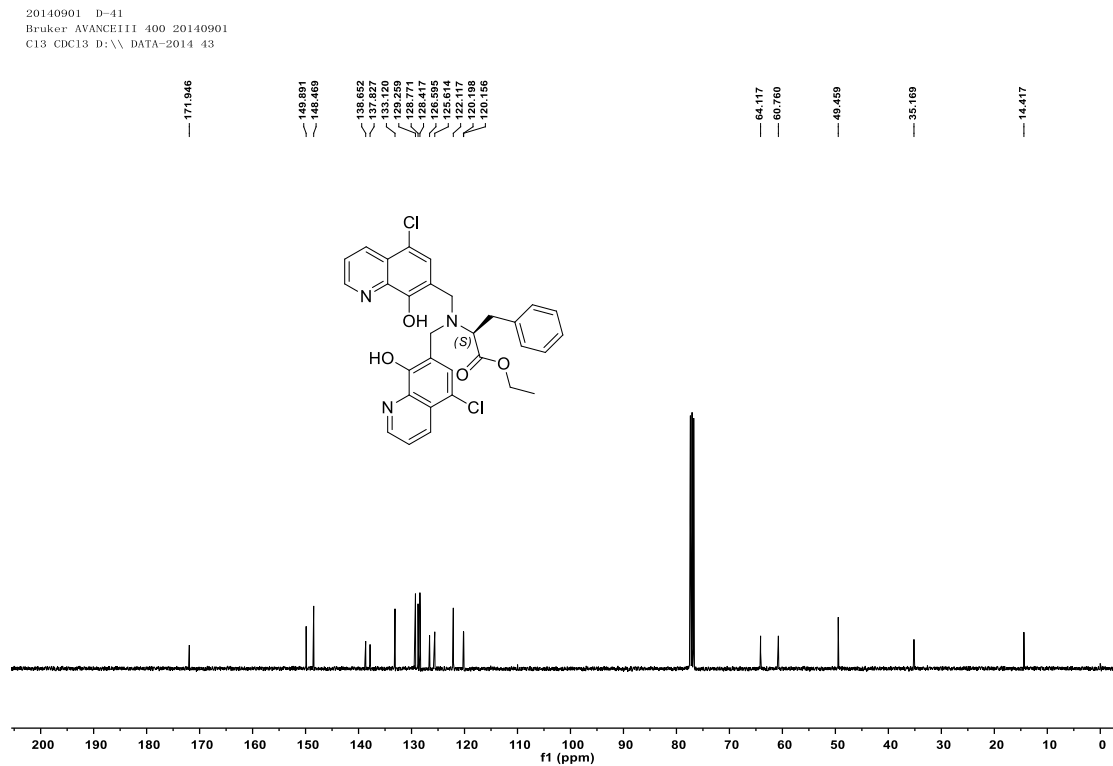

Supplement: s001 [file molecules-24-00548-s001.pdf]
